# Supplementary figures and images for: Pumice as a Novel Nature Heterogeneous Catalyst for Synthesis of 3,4-dihydropyrimidine-2-(1H)-Ones/Thiones via Biginelli Reaction under Solvent-free Conditions
Source: Preprints.org preprint supplement (doi:10.20944/preprints202105.0493.v1), 2021-05-20

**
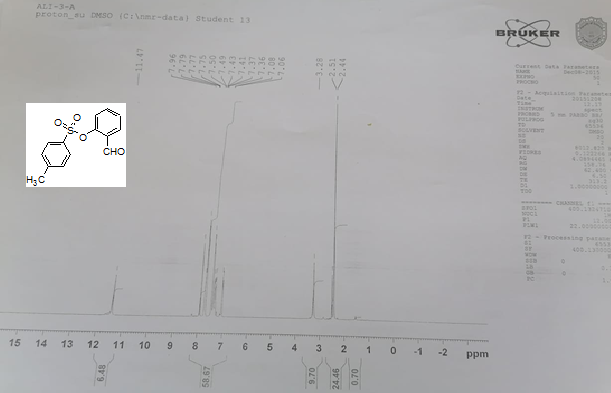
**

**
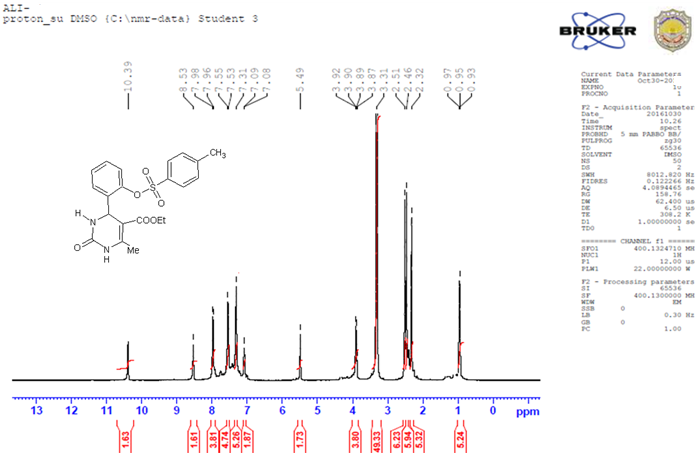
**

**
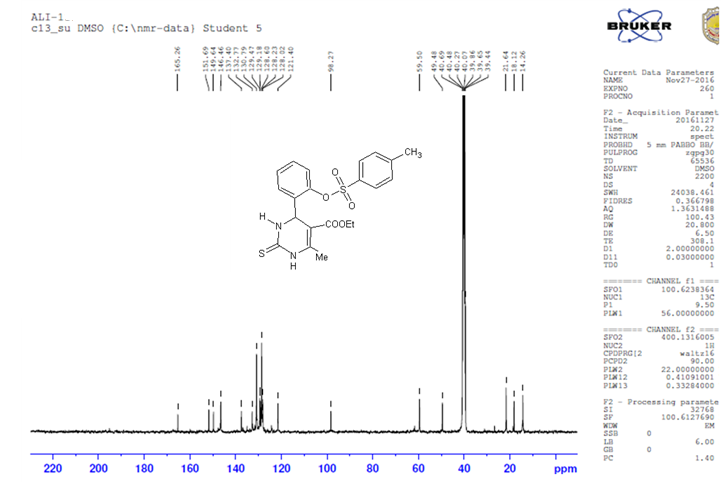
**

**
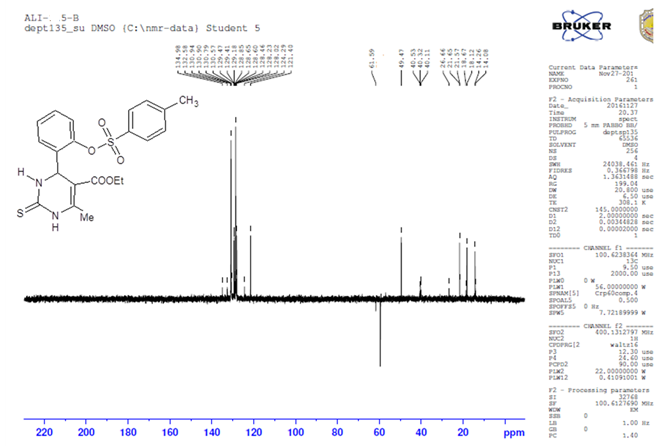
**

**
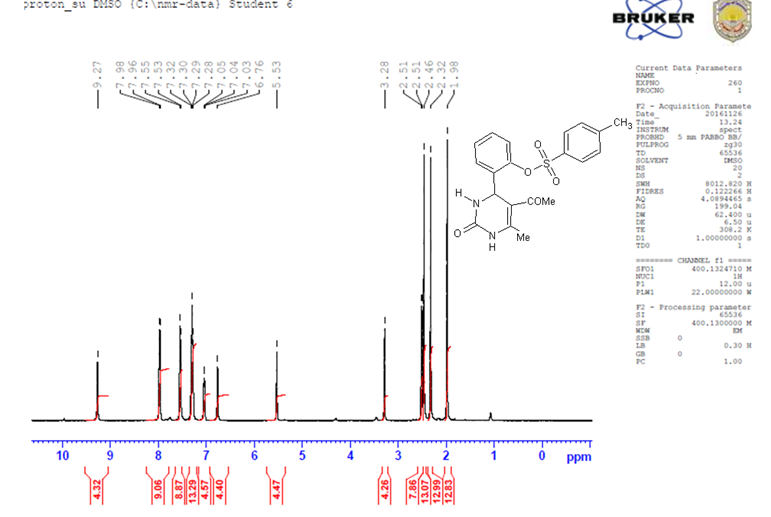
**

**
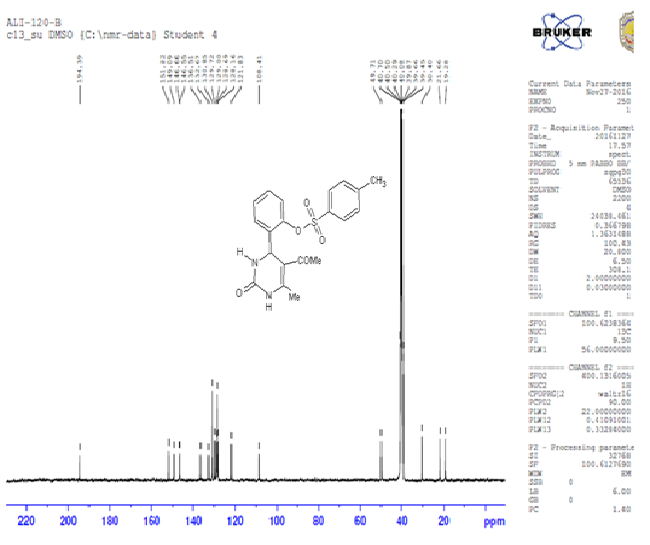
**

**
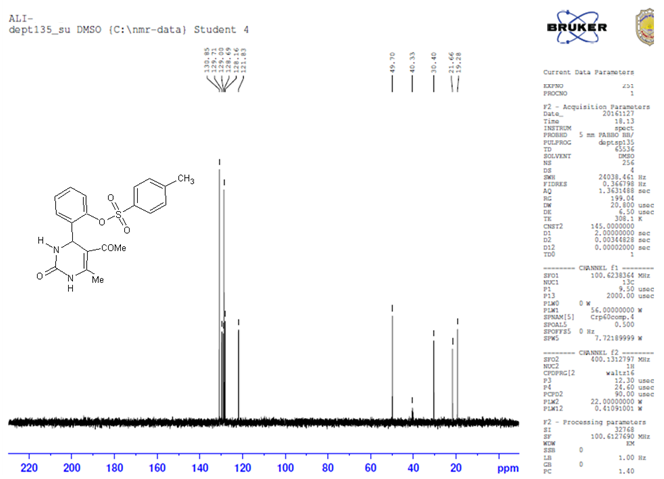
**


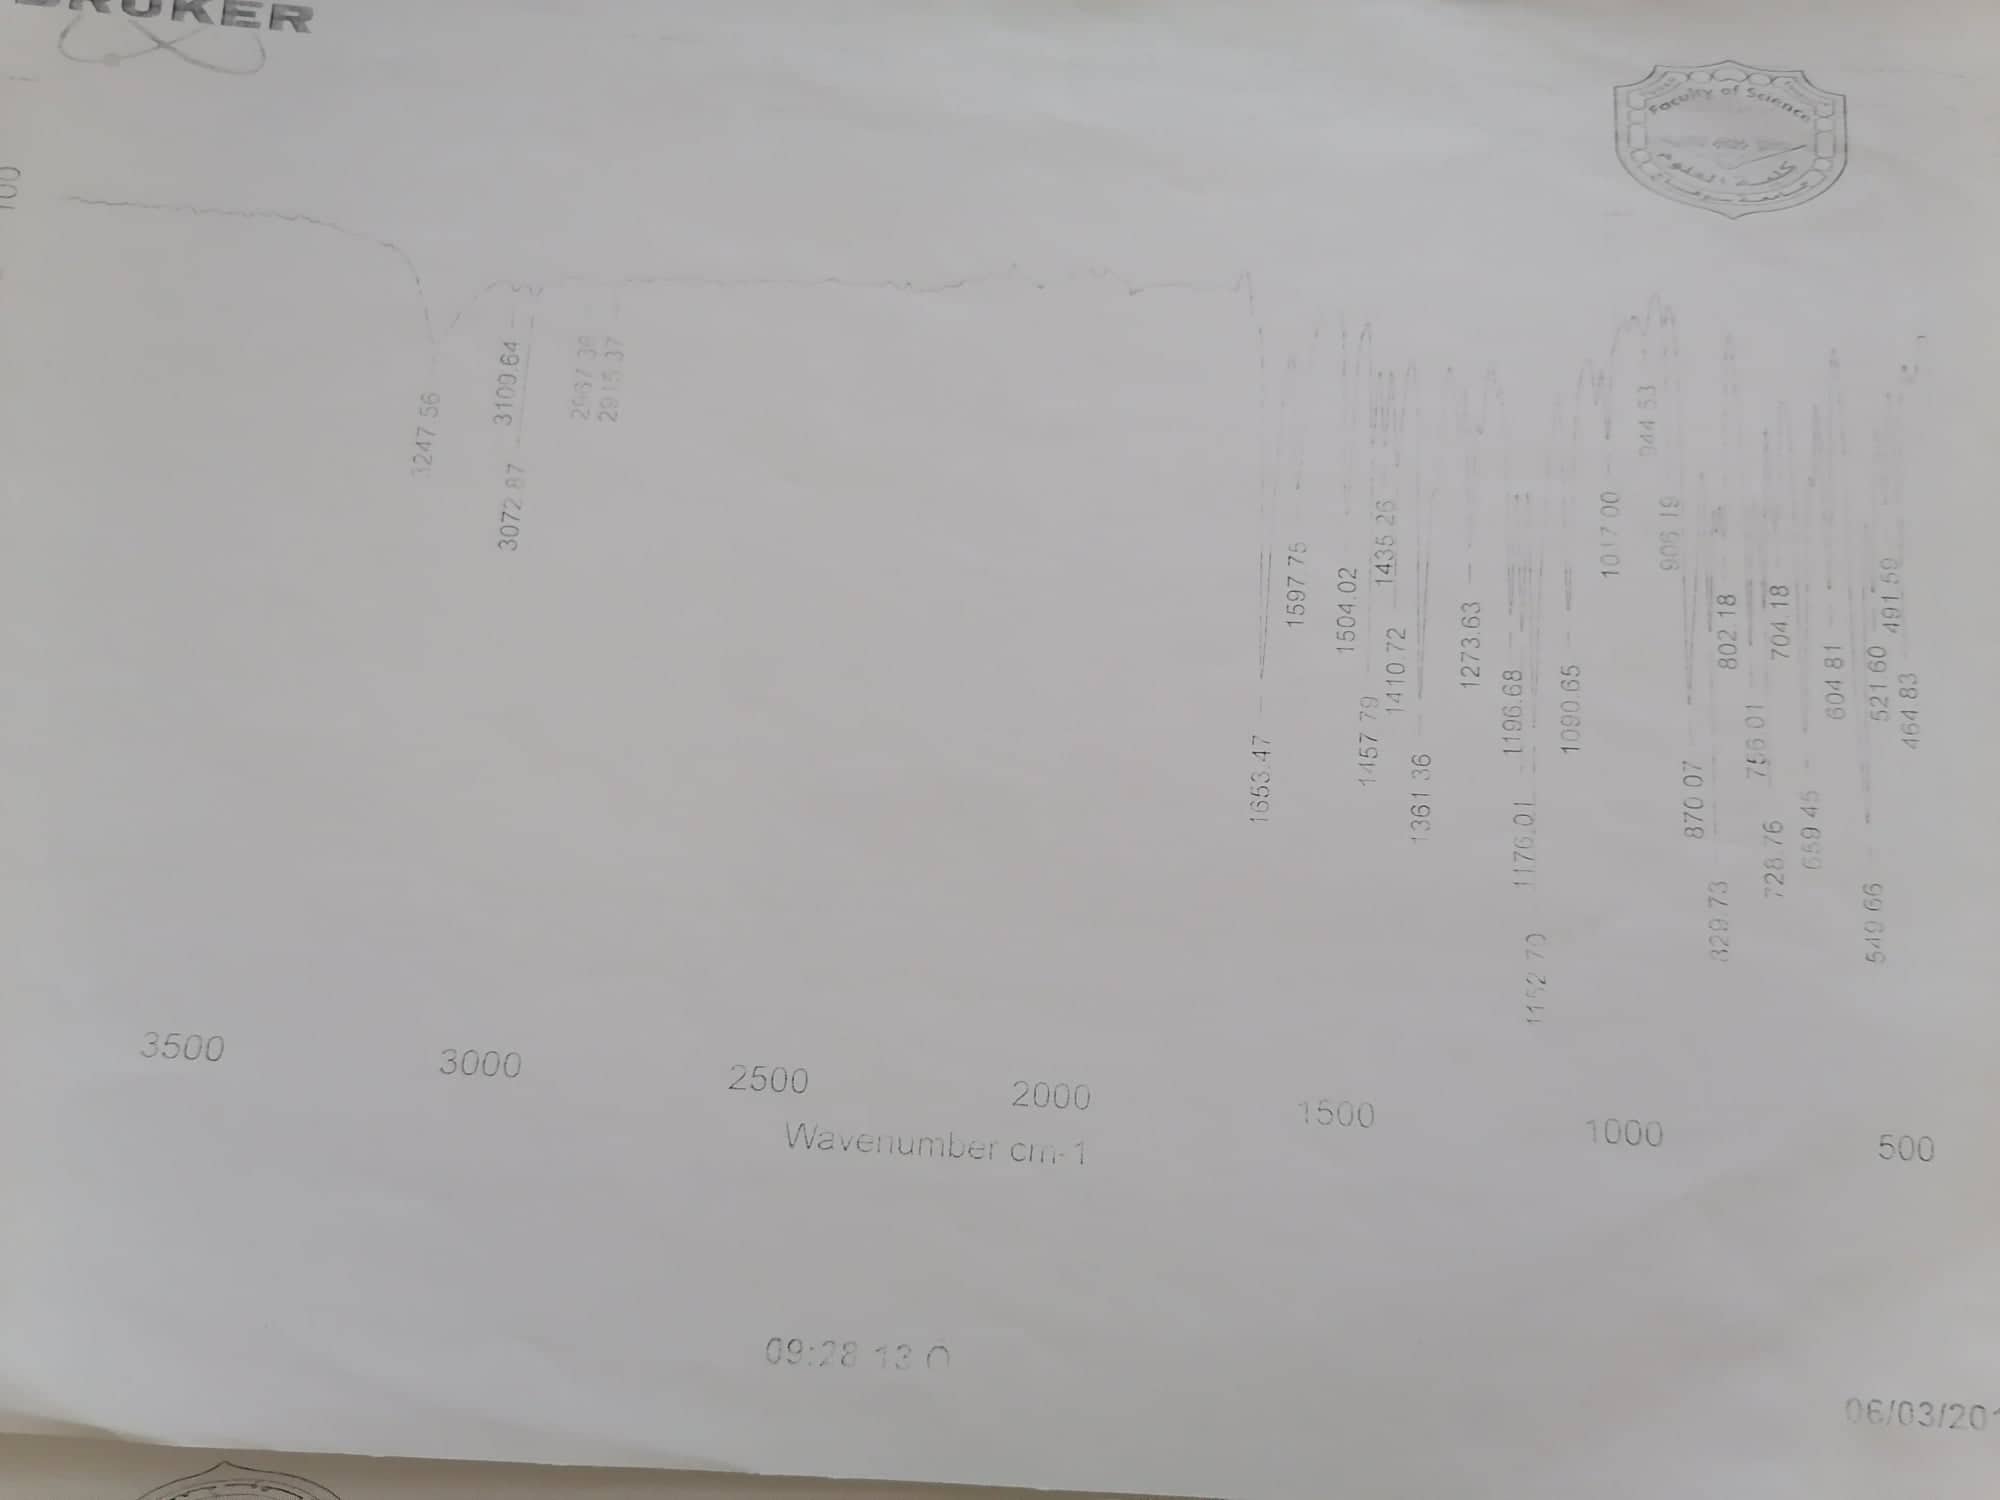


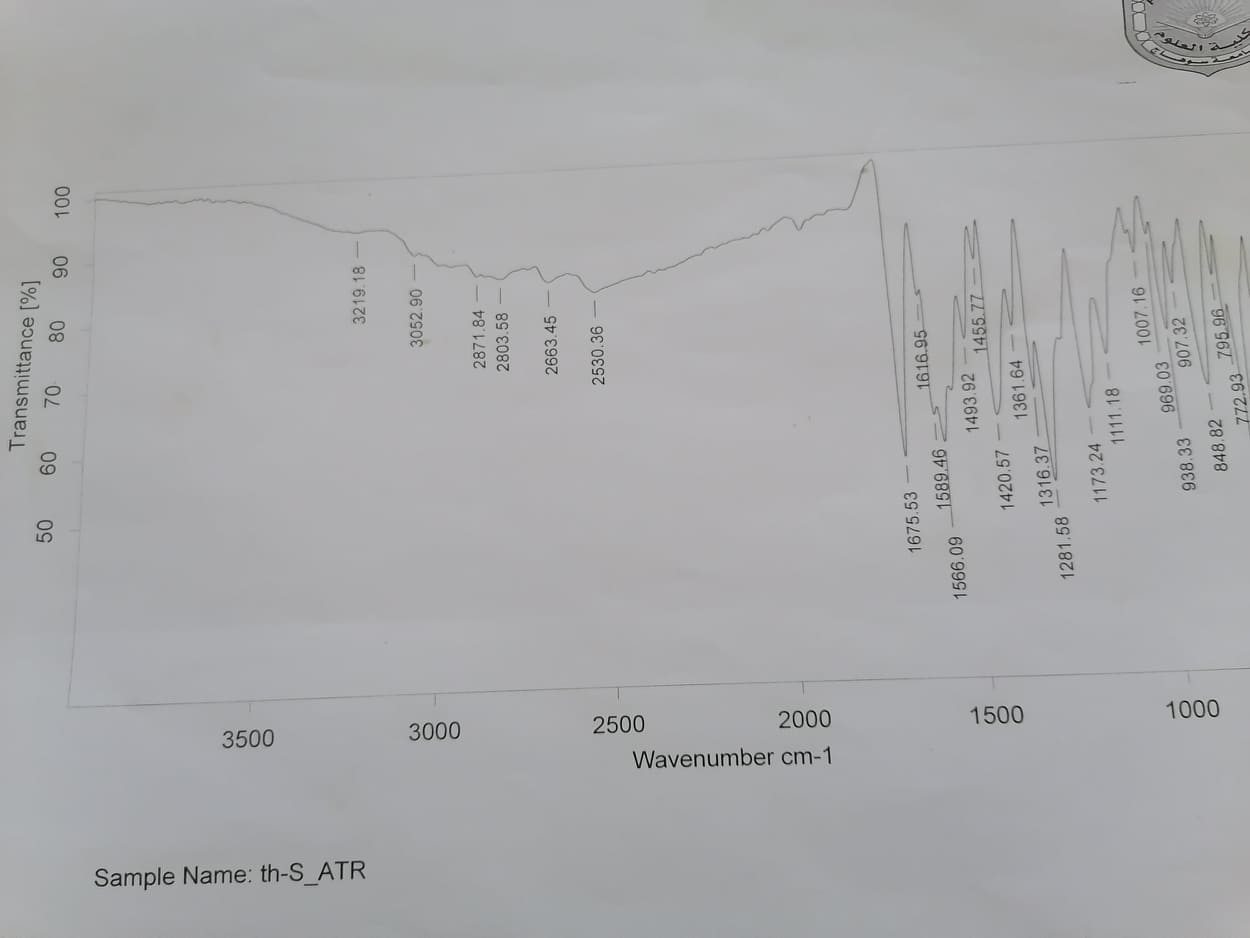


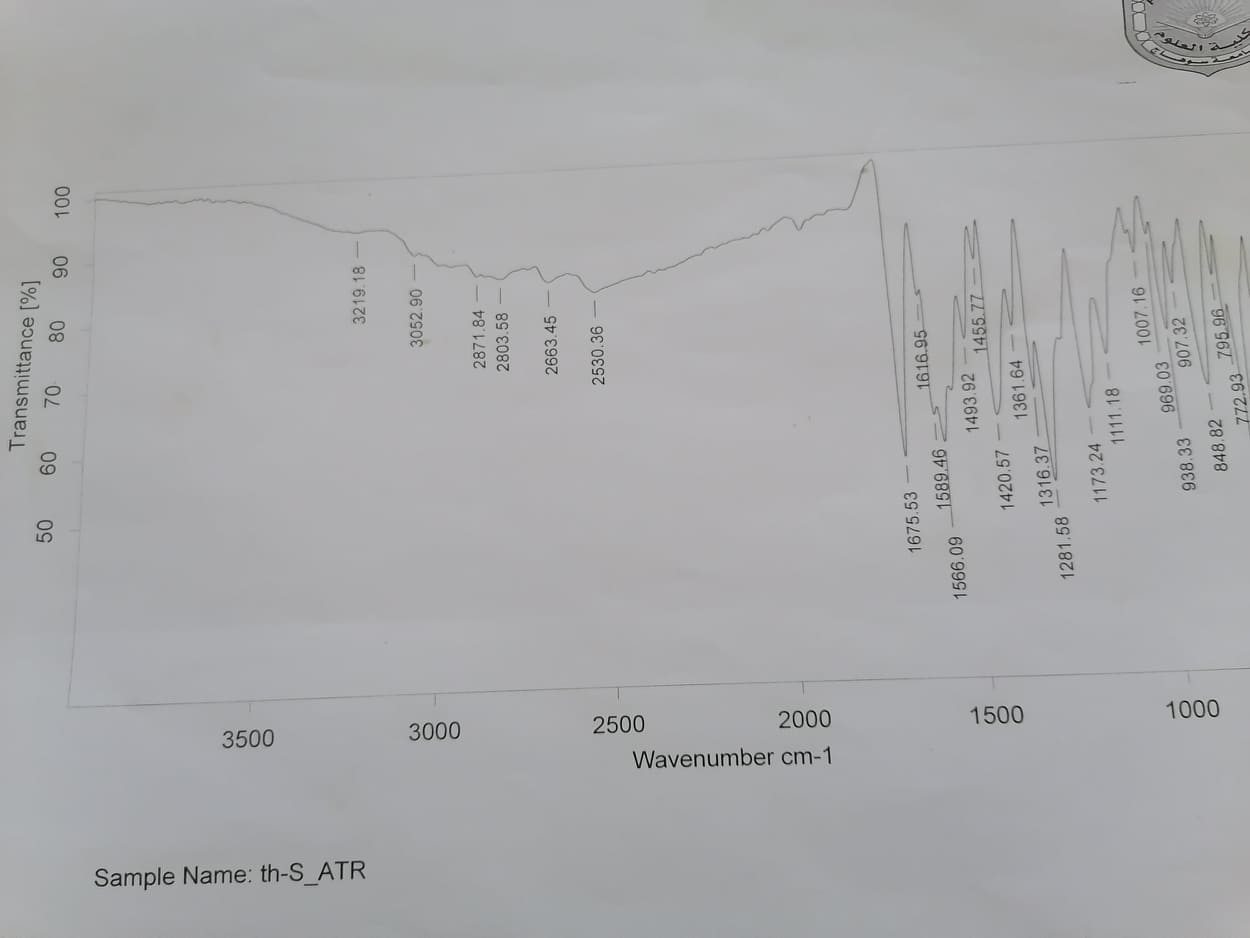


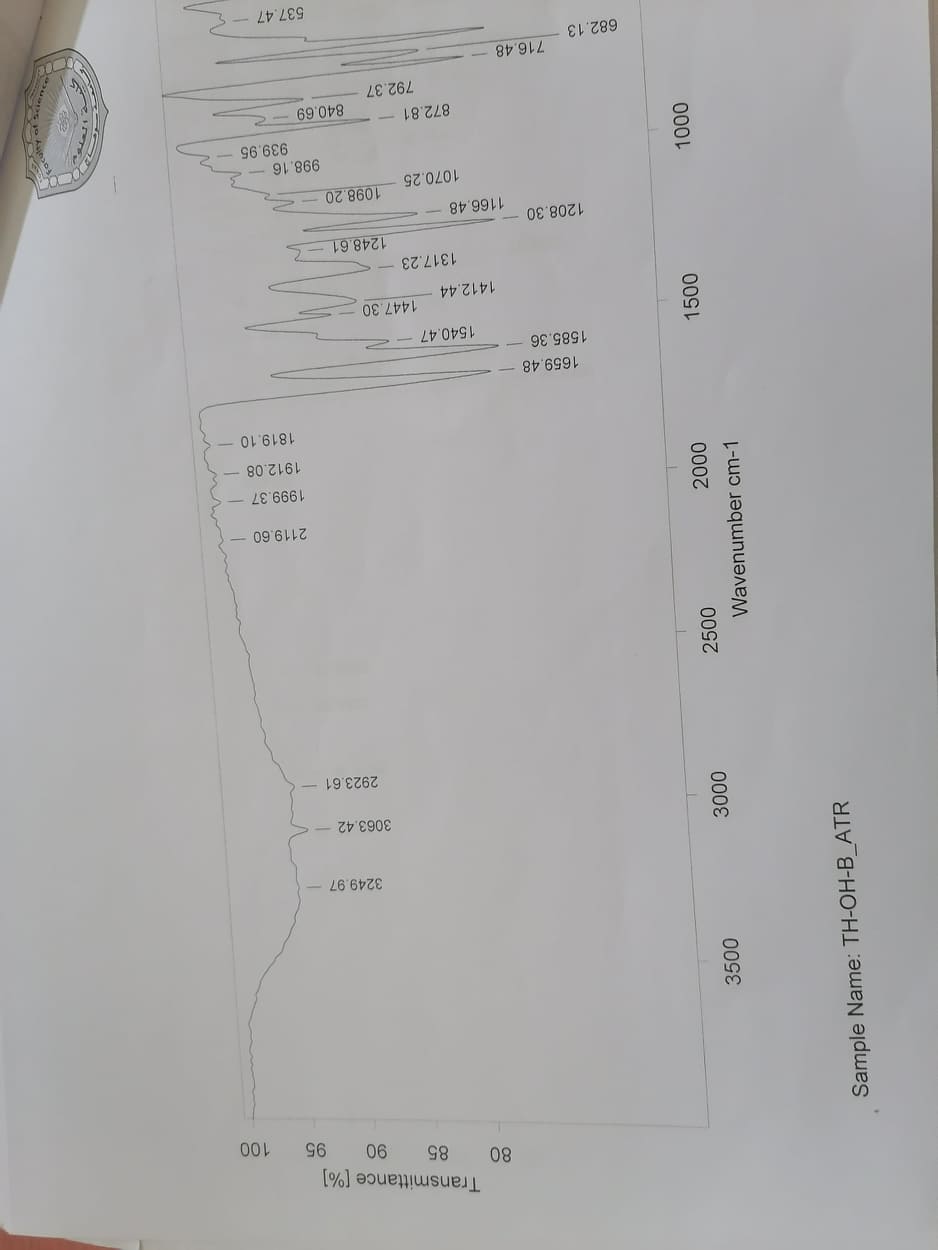


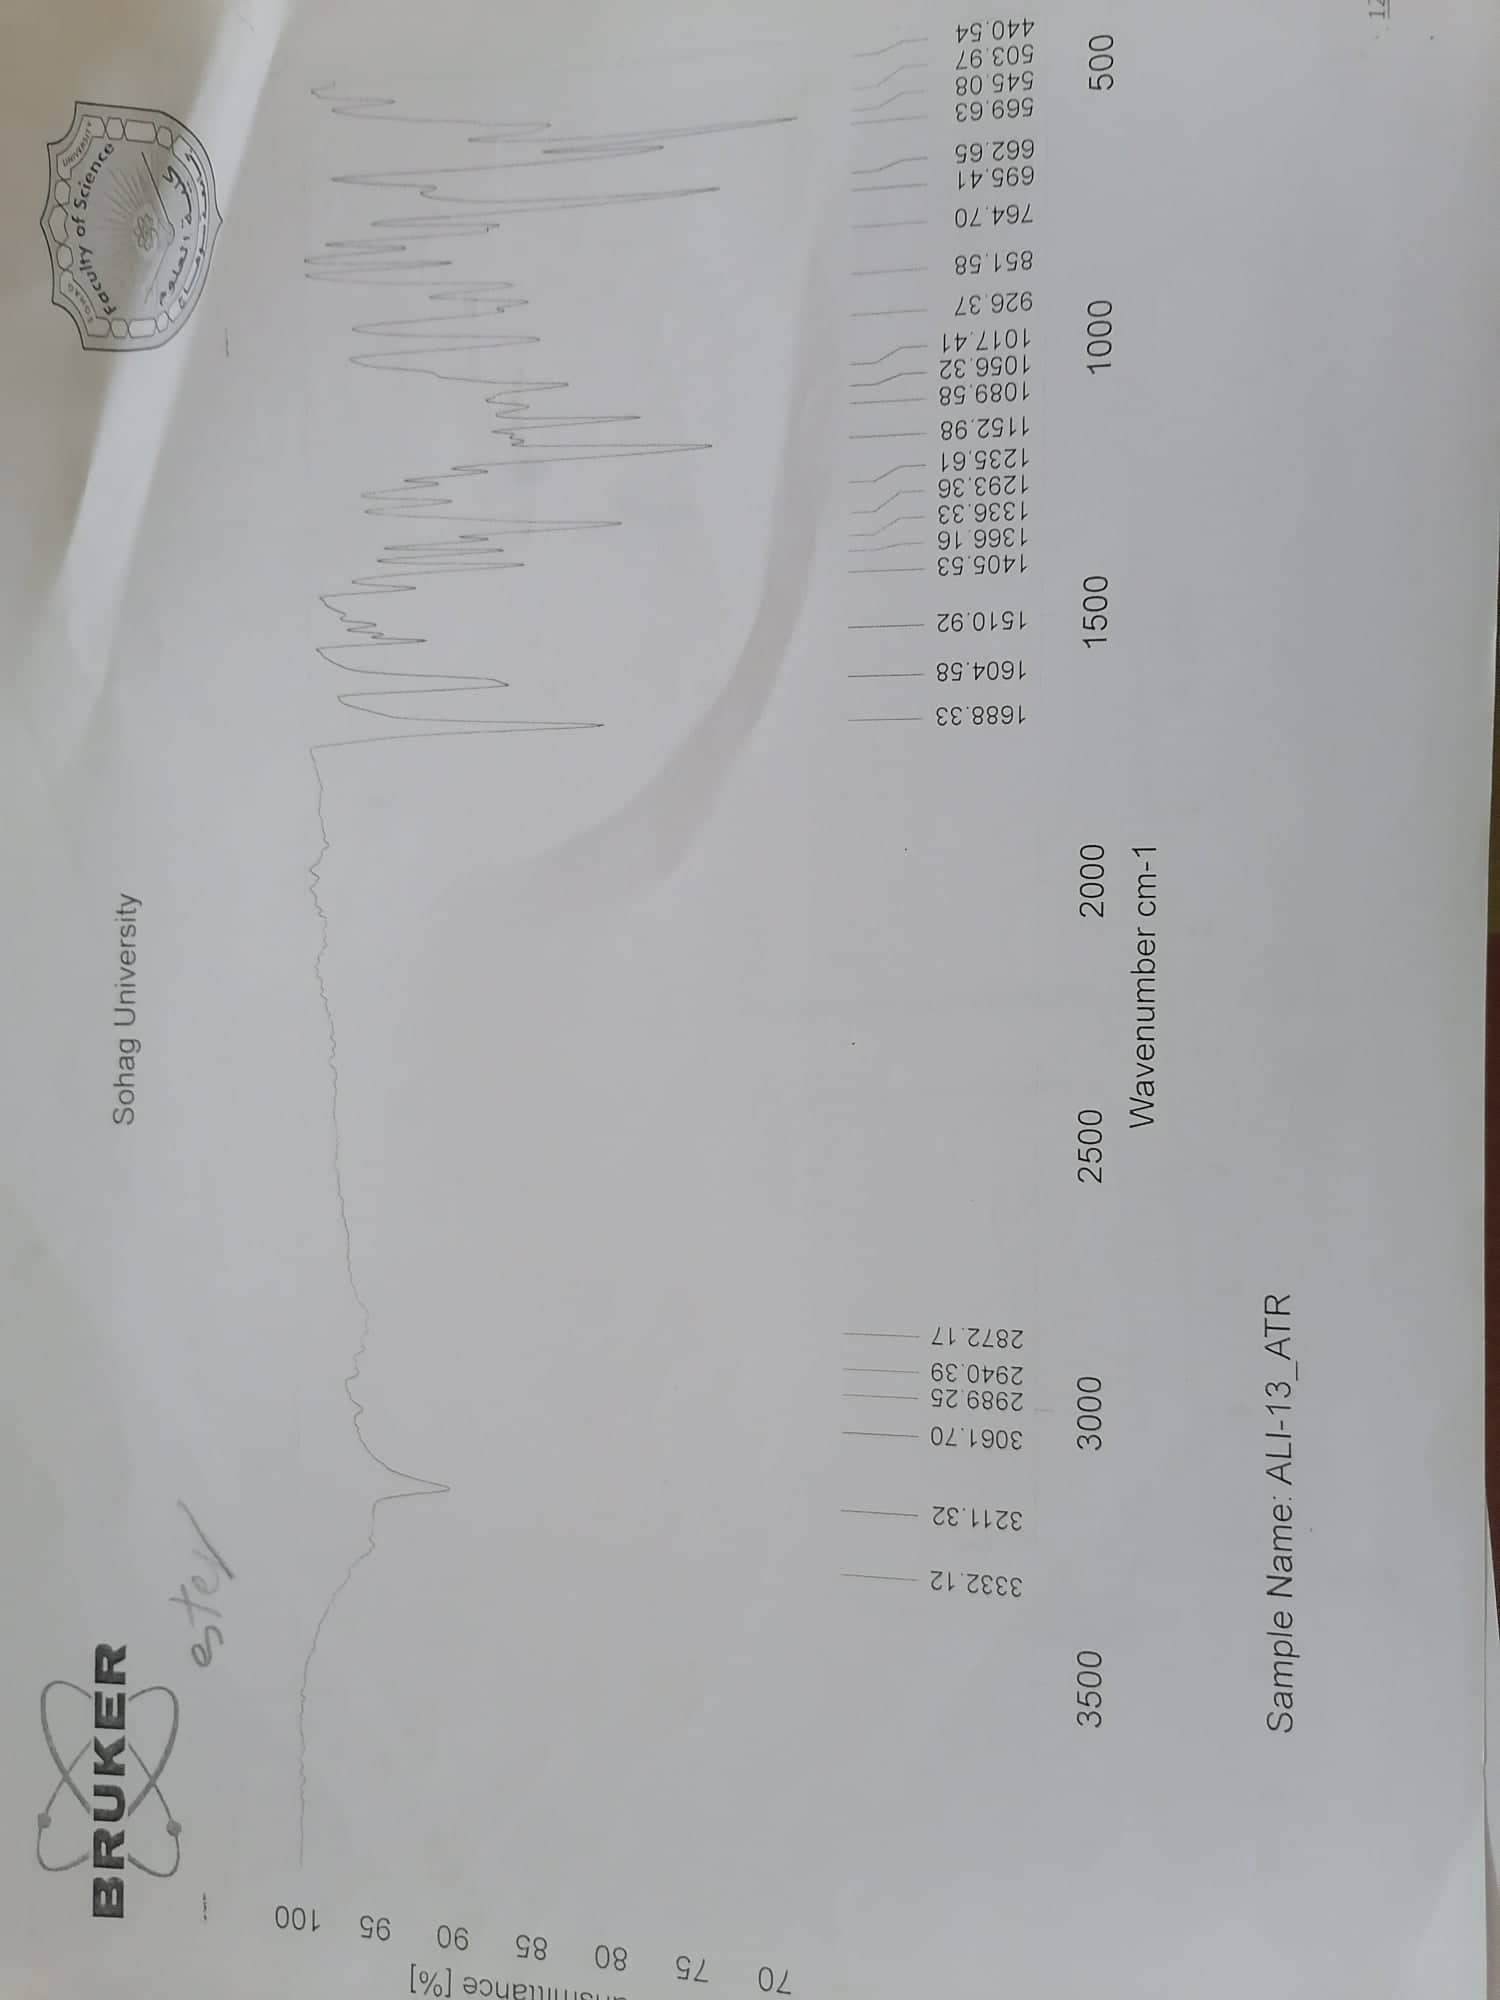

Supplement: Supplementary file 1 [file supplementary]
